# Supplementary material for: Local structure and lithium mobility in intercalated Li3AlxTi2−x(PO4)3 NASICON type materials: a combined neutron diffraction and NMR study
Source: Royal Society of Chemistry journal article supplement (doi:10.1039/c4cp02938k), 2014-01-01
Supplement: c4cp02938k1.pdf [file c4cp02938k1.pdf]

SUPPLEMENTARY MATERIAL

Table SM-1. Structural information deduced from the Rietveld analysis of ND patterns of  $\text{Li}_3\text{Ti}_2(\text{PO}_4)_3$ . Thermal B factors are given in  $\text{\AA}^{-1}$ ; x/a, y/b and z/c are dimensionless and Occ occupancies are expressed as percentages.

|                 | 100K         | 200K         | 300K         | 400K         |
|-----------------|--------------|--------------|--------------|--------------|
| a               | 8.37028(28)  | 8.37465(21)  | 8.38314(17)  | 8.39612(17)  |
| c               | 22.88900(48) | 22.87864(77) | 22.87180(63) | 22.85708(63) |
| Li x/a          | 0.0266(23)   | 0.0251(20)   | 0.0294(18)   | 0.0260(29)   |
| y/b             | 0.3091(23)   | 0.3097(19)   | 0.3149(17)   | 0.3093(29)   |
| z/c             | 0.0448(7)    | 0.0446(6)    | 0.0442(6)    | 0.0458(8)    |
| B               | 0.32         | 0.58         | 1.52         | 1.64         |
| Occ             | 2.06         | 2.11         | 2.13         | 1.95         |
| Li x/a          | 0.0482(47)   | 0.0542(43)   | 0.0851(50)   | 0.0885(53)   |
| y/b             | 0.3578(49)   | 0.3663(47)   | 0.3987(50)   | 0.4023(60)   |
| z/c             | 0.1189(16)   | 0.1201(15)   | 0.1198(18)   | 0.1169(22)   |
| B               | 0.32         | 0.58         | 1.52         | 1.64         |
| Occ             | 0.94         | 0.89         | 0.80         | 0.85         |
| Ti z/c          | 0.1434(6)    | 0.1424(5)    | 0.1418(4)    | 0.1434(6)    |
| B               | 0.56         | 0.65         | 0.63         | 0.90         |
| Occ             | 1            | 1            | 1            | 1            |
| Ti z/c          | 0.3467(6)    | 0.3459(5)    | 0.3464(4)    | 0.3469(6)    |
| B               | 0.56         | 0.65         | 0.63         | 0.90         |
| Occ             | 1            | 1            | 1            | 1            |
| P x/a           | 0.2893(5)    | 0.2892(4)    | 0.2889(4)    | 0.2919(5)    |
| y/b             | -0.0008(6)   | -0.0017(5)   | -0.0019(4)   | 0.0001(6)    |
| z/c             | 0.2507(2)    | 0.2506(2)    | 0.2505(2)    | 0.2502(2)    |
| B               | 0.12         | 0.10         | 0.10         | 0.36         |
| O1 x/a          | 0.1642(6)    | 0.1650(5)    | 0.1670(4)    | 0.1671(6)    |
| y/b             | 0.2171(6)    | 0.2169(5)    | 0.2181(4)    | 0.2162(6)    |
| z/c             | 0.0897(2)    | 0.0900(1)    | 0.0897(1)    | 0.0901(2)    |
| B               | 0.84         | 1.00         | 1.05         | 1.15         |
| O2 x/a          | 0.1371(5)    | 0.1359(4)    | 0.1354(4)    | 0.1385(5)    |
| y/b             | 0.2304(6)    | 0.2288(5)    | 0.2279(4)    | 0.2286(6)    |
| z/c             | 0.3982(2)    | 0.3983(2)    | 0.3980(1)    | 0.3984(2)    |
| B               | 0.72         | 0.80         | 0.83         | 0.88         |
| O3 x/a          | 0.1944(6)    | 0.1957(5)    | 0.1966(4)    | 0.1961(6)    |
| y/b             | 0.9907(5)    | 0.9914(4)    | 0.992(4)     | 0.9925(6)    |
| z/c             | 0.1939(2)    | 0.1938(2)    | 0.1933(1)    | 0.1933(2)    |
| B               | 0.96         | 1.25         | 1.63         | 1.84         |
| O4 x/a          | 0.9085(5)    | 0.9087(4)    | 0.9095(4)    | 0.9110(6)    |
| y/b             | 0.1434(6)    | 0.1443(5)    | 0.1449(4)    | 0.1461(6)    |
| z/c             | 0.2994(2)    | 0.2993(1)    | 0.2993(1)    | 0.2993(2)    |
| B               | 0.88         | 1.07         | 1.24         | 1.44         |
| R <sub>B</sub>  | 4.8          | 4.6          | 5.1          | 9.1          |
| R <sub>F</sub>  | 3.0          | 2.8          | 3.0          | 8.0          |
| $\chi^2$        | 7.1          | 5.1          | 3.6          | 1.4          |
| R <sub>P</sub>  | 16.4         | 14.9         | 13.5         | 26.6         |
| R <sub>wp</sub> | 16.6         | 14.3         | 12.4         | 17.3         |

Table SM-2. Structural information deduced from the Rietveld analysis of ND patterns of  $\text{Li}_3\text{Ti}_{1.8}\text{Al}_{0.2}(\text{PO}_4)_3$ . Thermal B factors are given in  $\text{\AA}^{-1}$ ; x/a, y/b and z/c are dimensionless and Occ occupancies are expressed as percentages.

|                 | 5K           | 100K         | 200K         | 300K         | 400K         | 500K         |
|-----------------|--------------|--------------|--------------|--------------|--------------|--------------|
| a               | 8.34619(10)  | 8.34714(10)  | 8.35203(10)  | 8.36000(11)  | 8.37578(11)  | 8.39187(12)  |
| c               | 22.78888(36) | 22.78375(36) | 22.77614(38) | 22.76789(41) | 22.74957(41) | 22.73297(42) |
| Li x/a          | 0.0292(12)   | 0.0306(12)   | 0.0306(12)   | 0.0333(14)   | 0.0288(15)   | 0.0227(19)   |
| y/b             | 0.3133(11)   | 0.3111(11)   | 0.3110(12)   | 0.3134(14)   | 0.3103(14)   | 0.3072(17)   |
| z/c             | 0.0448(4)    | 0.0448(4)    | 0.0449(4)    | 0.0463(4)    | 0.0482(5)    | 0.0501(6)    |
| B               | 0.71         | 0.80         | 0.88         | 1.17         | 1.90         | 3.38         |
| Occ             | 2.17         | 2.12         | 2.10         | 2.13         | 2.00         | 1.95         |
| Li x/a          | 0.0613(29)   | 0.0474(26)   | 0.0518(26)   | 0.0603(32)   | 0.0649(35)   | 0.0748(49)   |
| y/b             | 0.3800(29)   | 0.3697(27)   | 0.3744(27)   | 0.3784(35)   | 0.3855(37)   | 0.3917(52)   |
| z/c             | 0.1179(9)    | 0.1191(9)    | 0.1183(9)    | 0.1189(11)   | 0.1206(13)   | 0.1189(19)   |
| B               | 0.71         | 0.80         | 0.88         | 1.17         | 1.90         | 3.38         |
| Occ             | 0.83         | 0.88         | 0.88         | 0.87         | 0.80         | 0.73         |
| Ti z/c          | 0.1441(3)    | 0.1435(3)    | 0.1435(3)    | 0.1438(3)    | 0.1432(3)    | 0.1438(3)    |
| B               | 0.42         | 0.38         | 0.29         | 0.52         | 0.67         | 0.99         |
| Occ             | 0.92         | 0.90         | 0.87         | 0.90         | 0.90         | 0.94         |
| Ti z/c          | 0.3478(3)    | 0.3477(3)    | 0.3475(3)    | 0.3477(4)    | 0.3473(4)    | 0.3476(4)    |
| B               | 0.42         | 0.38         | 0.29         | 0.52         | 0.67         | 0.99         |
| Occ             | 0.90         | 0.89         | 0.91         | 0.93         | 0.92         | 0.92         |
| P x/a           | 0.2909(2)    | 0.2909(3)    | 0.2902(3)    | 0.2912(3)    | 0.2914(3)    | 0.2914(3) -  |
| y/b             | -0.0013(3)   | -0.0008(3)   | -0.0016(3)   | -0.0008(4)   | -0.0007(3)   | 0.0003(3)    |
| z/c             | 0.2502(1)    | 0.2506(1)    | 0.2505(1)    | 0.2505(1)    | 0.2504(1)    | 0.2503(1)    |
| B               | 0.40         | 0.46         | 0.53         | 0.49         | 0.52         | 0.69         |
| O1 x/a          | 0.1659(2)    | 0.1664(3)    | 0.1667(3)    | 0.1669(3)    | 0.1664(3)    | 0.16720( 31) |
| y/b             | 0.2160(3)    | 0.2153(3)    | 0.2155(3)    | 0.2148(3)    | 0.2129(3)    | 0.21224( 32) |
| z/c             | 0.0899(1)    | 0.0900(1)    | 0.0899(1)    | 0.0896(1)    | 0.0899(1)    | 0.08950( 10) |
| B               | 0.55         | 0.82         | 1.11         | 1.26         | 1.34         | 1.53         |
| O2 x/a          | 0.1356(2)    | 0.1356(3)    | 0.1358(3)    | 0.1360(3)    | 0.1375(3)    | 0.1397(3)    |
| y/b             | 0.2293(3)    | 0.2300(3)    | 0.2293(3)    | 0.2283(3)    | 0.2291(3)    | 0.2293(3)    |
| z/c             | 0.3984(1)    | 0.3985(1)    | 0.3985(1)    | 0.3987(1)    | 0.3988(1)    | 0.3989(1)    |
| B               | 0.46         | 0.83         | 1.01         | 0.84         | 1.10         | 1.41         |
| O3 x/a          | 0.1941(3)    | 0.1932( 3)   | 0.1943(3)    | 0.1951(3)    | 0.1947(3)    | 0.1955(4)    |
| y/b             | 0.9926(3)    | 0.9921(3)    | 0.9918(3)    | 0.9925(3)    | 0.9915(3)    | 0.9916(3)    |
| z/c             | 0.1932(1)    | 0.1935(1)    | 0.1933(1)    | 0.1932(1)    | 0.1930(1)    | 0.1929(1)    |
| B               | 0.99         | 1.52         | 1.75         | 1.85         | 2.09         | 2.28         |
| O4 x/a          | 0.9118(3)    | 0.9106(3)    | 0.9114(3)    | 0.9118(3)    | 0.9122(3)    | 0.9126(3)    |
| y/b             | 0.1460(3)    | 0.1461(3)    | 0.1456(3)    | 0.1455(3)    | 0.1449(3)    | 0.1442(3)    |
| z/c             | 0.2996(1)    | 0.2998(1)    | 0.2995(1)    | 0.2994(1)    | 0.2994(1)    | 0.2995(1)    |
| B               | 0.86         | 1.16         | 1.33         | 1.44         | 1.62         | 1.79         |
| R <sub>B</sub>  | 4.5          | 4.0          | 4.0          | 4.4          | 5.1          | 5.4          |
| R <sub>F</sub>  | 2.5          | 2.8          | 3.3          | 3.6          | 3.7          | 3.8          |
| $\chi^2$        | 1.9          | 1.8          | 1.9          | 2.3          | 2.4          | 2.4          |
| R <sub>P</sub>  | 10.6         | 11.3         | 11.9         | 12.9         | 12.6         | 12.7         |
| R <sub>wp</sub> | 9.1          | 9.4          | 9.8          | 11.3         | 10.5         | 10.7         |
